# Supplementary material for: Boundary activated hydrogen evolution reaction on monolayer MoS2
Source: PubMed Central journal article supplement (PMC6430794; doi:10.1038/s41467-019-09269-9), 2019-03-22
Supplement: 41467_2019_9269_MOESM2_ESM.pdf [file 41467_2019_9269_MOESM2_ESM.pdf]

## Description of Additional Supplementary Files

File Name: Supplementary Movie 1

Description: **Wafer-scale multi-hierarchy MoS<sub>2</sub> catalysts for HER.** The video of the catalytic HER activity in 0.5-M H<sub>2</sub>SO<sub>4</sub> from a multi-hierarchy MoS<sub>2</sub> catalyst with a size of 4 inches in diameter.
